# Supplementary material for: Unusually high Seebeck coefficient arising from temperature-dependent carrier concentration in PbSe–AgSbSe2 alloys
Source: Royal Society of Chemistry journal article supplement (doi:10.1039/d1tc04158d), 2021-01-01
Supplement: d1tc04158d1.pdf [file d1tc04158d1.pdf]

Supporting Information

**Unusually High Seebeck coefficient arisen from the temperature-dependent carrier concentration in PbSe-AgSbSe<sub>2</sub> alloys**

Xuemei Wang<sup>1,2</sup>, Gang Wu<sup>1,2</sup>, Jianfeng Cai<sup>1</sup>, Qiang Zhang<sup>1,2</sup>, Junxuan Yang<sup>1</sup>, Lidong Chen<sup>1,2</sup>, Haoyang Hu<sup>1</sup>, Guoqiang Liu<sup>\*1,2</sup>, Xiaojian Tan<sup>\*1,2</sup>, Jun Jiang<sup>\*1,2</sup>.

<sup>1</sup> Ningbo Institute of Materials Technology and Engineering, Chinese Academy of Sciences, Ningbo 315201, China.

<sup>2</sup> Center of Materials Science and Optoelectronics Engineering University of Chinese Academy of Sciences, Beijing, 101408, China.

E-mail: liugq@nimte.ac.cn, tanxiaojian@nimte.ac.cn, jjun@nimte.ac.cn.

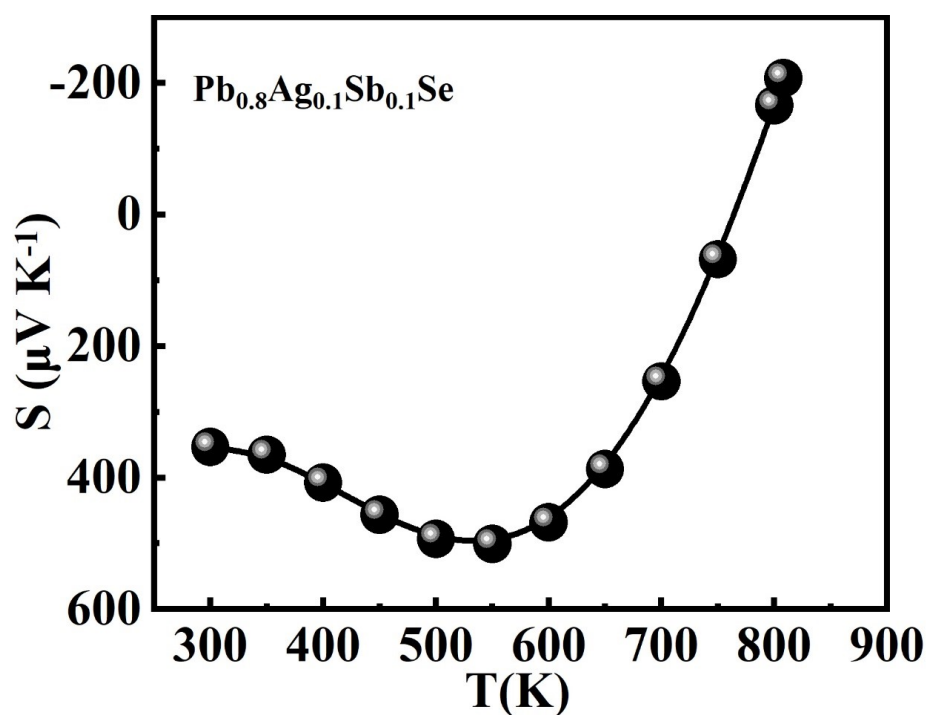

**Figure S1.** The Seebeck coefficient of  $x = 0$  for  $\text{Pb}_{0.8-x/3}\text{Ag}_{0.1}\text{Sb}_{0.1+x/3}\text{Se}_{1-x}\text{Cl}_x$

Hall measurement

Run-time operator

Sample

ID: \_\_\_\_\_  
 Type: van der Pauw  
 Thickness \_\_\_\_\_  
 t [mm]: 1  
 Other dimensions \_\_\_\_\_  
 Lp [mm]: \_\_\_\_\_  
 Hall factor: 1  
 Max voltage [V]: 20  
 Max current [mA]: 50  
 Gate bias voltage [V]: 0

573 K

L<sub>p</sub> = perimeter length

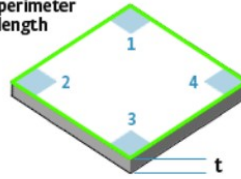

Comment:

| Final results       |                                                 | Mean value | Limit |
|---------------------|-------------------------------------------------|------------|-------|
| $\mu_H$             | Hall mobility [m <sup>2</sup> /V·s]             | 3.92E-3    |       |
|                     | Carrier type                                    | N          | 100%  |
| n                   | Carrier concentration [1/m <sup>3</sup> ]       | 9.13E24    |       |
| n <sub>sheet</sub>  | Sheet carrier concentration [1/m <sup>2</sup> ] | 9.13E21    |       |
| R <sub>H</sub>      | Hall coefficient [m <sup>3</sup> /C]            | 6.84E-7    |       |
| R <sub>Hsheet</sub> | Sheet Hall coefficient [m <sup>2</sup> /C]      | 6.84E-4    |       |
| ρ                   | Resistivity [Ω·m]                               | 1.75E-4    |       |
| ρ <sub>sheet</sub>  | Sheet resistivity [Ω/□]                         | 1.75E-1    |       |
| V <sub>H</sub>      | Hall voltage [V]                                | -3.0422E-5 |       |
|                     | Phase [deg.]                                    |            |       |
|                     | Worst case Ohmic check correlation (2-4)        | 9.9960E-1  |       |

Measurement comment

Hall measurement

Run-time operator

Sample

ID: \_\_\_\_\_  
 Type: van der Pauw  
 Thickness \_\_\_\_\_  
 t [mm]: 1  
 Other dimensions \_\_\_\_\_  
 Lp [mm]: \_\_\_\_\_  
 Hall factor: 1  
 Max voltage [V]: 20  
 Max current [mA]: 50  
 Gate bias voltage [V]: 0

673 K

L<sub>p</sub> = perimeter length

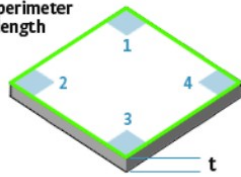

Comment:

| Final results       |                                                 | Mean value | Limit |
|---------------------|-------------------------------------------------|------------|-------|
| $\mu_H$             | Hall mobility [m <sup>2</sup> /V·s]             | 2.82E-3    |       |
|                     | Carrier type                                    | N          | 100%  |
| n                   | Carrier concentration [1/m <sup>3</sup> ]       | 1.85E25    |       |
| n <sub>sheet</sub>  | Sheet carrier concentration [1/m <sup>2</sup> ] | 1.85E22    |       |
| R <sub>H</sub>      | Hall coefficient [m <sup>3</sup> /C]            | 3.38E-7    |       |
| R <sub>Hsheet</sub> | Sheet Hall coefficient [m <sup>2</sup> /C]      | 3.38E-4    |       |
| ρ                   | Resistivity [Ω·m]                               | 1.20E-4    |       |
| ρ <sub>sheet</sub>  | Sheet resistivity [Ω/□]                         | 1.20E-1    |       |
| V <sub>H</sub>      | Hall voltage [V]                                | -1.5039E-5 |       |
|                     | Phase [deg.]                                    |            |       |
|                     | Worst case Ohmic check correlation (1-3)        | 1.0000E0   |       |

Measurement comment

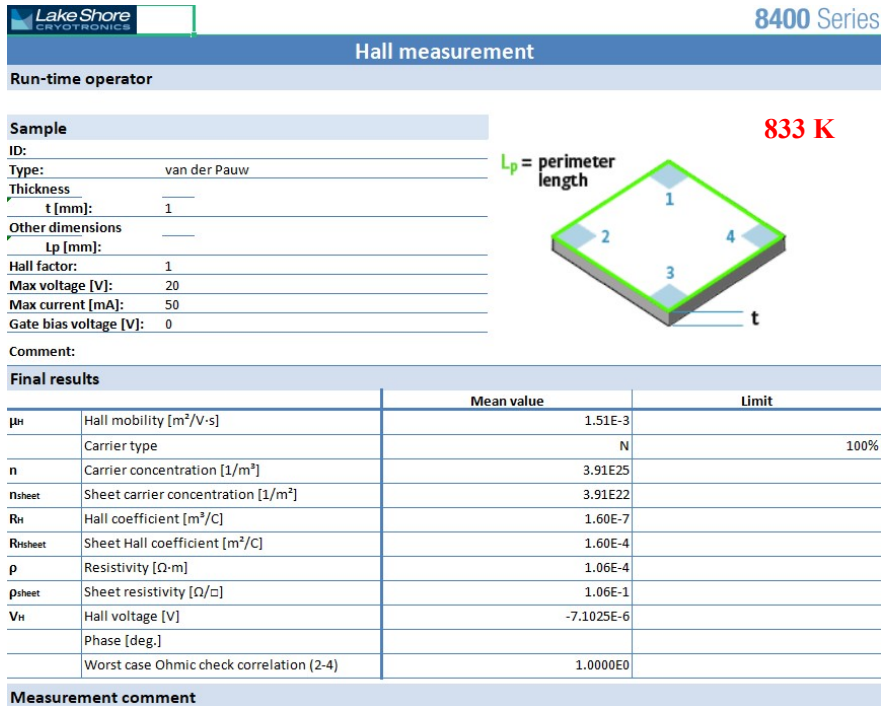

Figure S2. Original Hall measurement data of  $\text{Pb}_{0.794}\text{Ag}_{0.1}\text{Sb}_{0.106}\text{Se}_{0.982}\text{Cl}_{0.018}$  ( $x = 0.018$ ) sample at 573 K, 673 K, 833 K.

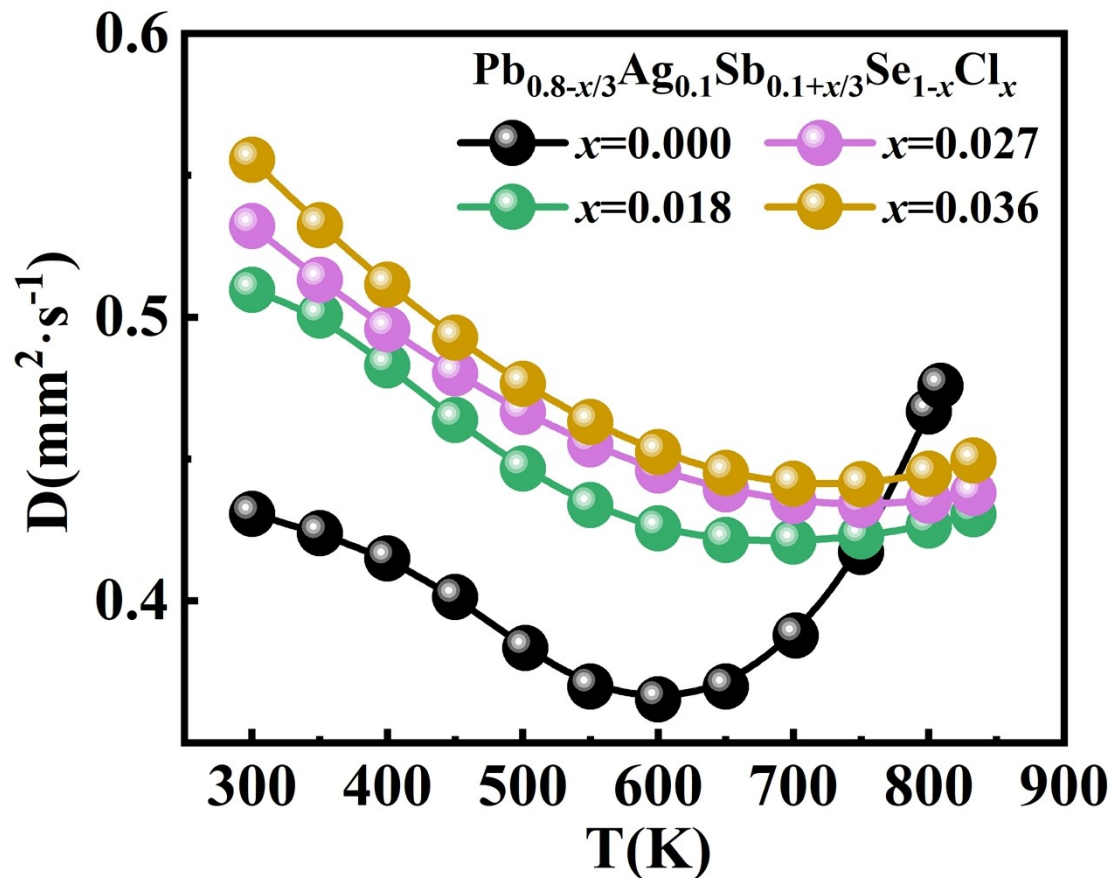

Figure S3. The thermal diffusivity D of  $\text{Pb}_{0.8-x/3}\text{Ag}_{0.1}\text{Sb}_{0.1+x/3}\text{Se}_{1-x}\text{Cl}_x$  ( $x = 0, 0.018, 0.027, 0.036$ ).

| $x$         | $\rho$<br>(g cm <sup>-3</sup> ) |
|-------------|---------------------------------|
| $x = 0.000$ | 7.850                           |
| $x = 0.018$ | 7.622                           |
| $x = 0.027$ | 7.579                           |
| $x = 0.036$ | 7.754                           |

**Table S1.** The density  $\rho$  of  $\text{Pb}_{0.8-x/3}\text{Ag}_{0.1}\text{Sb}_{0.1+x/3}\text{Se}_{1-x}\text{Cl}_x$  ( $x = 0, 0.018, 0.027, 0.036$ ) samples.
